# Supplementary material for: Comparison of Clinical and Imaginal Features According to the Pathological Grades of Dysplasia in Branch-Duct Intraductal Papillary Mucinous Neoplasm (BD-IPMN) for Personalized Medicine
Source: MDPI journal article supplement (doi:10.3390/jpm13010149), 2023-01-12
Supplement: s1 [file s1]

**Supplementary Table S1.** Summary of national guidelines.

|           | Type | Surgical indication                                                                                                                                                                                                                                      | EUS FNA indication                                                                                                  |
|-----------|------|----------------------------------------------------------------------------------------------------------------------------------------------------------------------------------------------------------------------------------------------------------|---------------------------------------------------------------------------------------------------------------------|
| 2015 AGA  |      | Solid component and dilated pancreatic duct and/or concerning features on EUS FNA (solid component and a dilated pancreatic duct)                                                                                                                        | At least 2 high risk features<br>Size $\geq 3$ cm<br>Dilated main pancreatic duct<br>Presence of an solid component |
| 2016 JAMA |      | Symptomatic<br>MD-IPMN or Mixed type<br>Cysts with High risk features<br>MPD $> 10$ mm<br>Solid component<br>Mural nodule<br>High risk features on EUS FNA<br>Positive cytology<br>Mural nodule<br>Thickened cyst wall<br>MPD 5-9 mm<br>Cyst $\geq 3$ cm | No High risk feature, but $\geq 3$ cm                                                                               |

|                                                    |          |                                                                                                                                                                                                                                                                                                                  |                |
|----------------------------------------------------|----------|------------------------------------------------------------------------------------------------------------------------------------------------------------------------------------------------------------------------------------------------------------------------------------------------------------------|----------------|
| 2017 Revisions of international consensus Fukuoka, | MD<br>BD | MPD >10 mm<br>Jaundice<br>Mural nodule                                                                                                                                                                                                                                                                           |                |
|                                                    | BD       | WF with concerning features on EUS FNA<br><br>WF<br>Pancreatitis<br>Cyst $\geq 3$ cm<br>Enhancing mural nodule <5mm<br>Thickened/enhancing cyst walls<br>MPD 5-9 mm<br>Abrupt change in pancreatic duct<br>Lymphadenopathy<br>Increased CA19-9<br>Cyst growth rate $\geq 5$ mm/2years<br><br>EUS FNA<br>Cytology | Presence of WF |

|              |    |                                                                                                                                                                                                                                                                                                                              |                                                                                                                                      |
|--------------|----|------------------------------------------------------------------------------------------------------------------------------------------------------------------------------------------------------------------------------------------------------------------------------------------------------------------------------|--------------------------------------------------------------------------------------------------------------------------------------|
|              |    | Mural nodule $\geq 5\text{mm}$<br>MPD involvement<br>anyone of thickened walls, intraductal mucin or mural nodules                                                                                                                                                                                                           |                                                                                                                                      |
| 2018 EEBGPCN | MD | Recommendation for the surgery                                                                                                                                                                                                                                                                                               |                                                                                                                                      |
|              | BD | Absolute<br>Positive cytology<br>Solid mass<br>Jaundice<br>Enhancing mural nodule $\geq 5\text{ mm}$<br>MPD $\geq 10\text{ mm}$<br>Relative<br>Cyst growth rate $\geq 5\text{ mm}/1\text{years}$<br>Increased CA19-9 ( $\geq 37\text{U/ml}$ )<br>MPD 5-9 mm<br>Cyst $\geq 4\text{ cm}$<br>New onset DM<br>Acute pancreatitis | Either clinical or radiological features of pancreas cystic neoplasm, in cases of unclear diagnosis based on cross-sectional imaging |

|  |  |                              |  |
|--|--|------------------------------|--|
|  |  | Enhancing mural nodule <5 mm |  |
|--|--|------------------------------|--|
